# Supplementary material for: Plasticity of Drug-Naïve and Vemurafenib- or Trametinib-Resistant Melanoma Cells in Execution of Differentiation/Pigmentation Program
Source: Hindawi journal article supplement (doi:10.1155/2019/1697913), 2019-07-03
Supplement: f1 [file 1697913.f1.pdf]

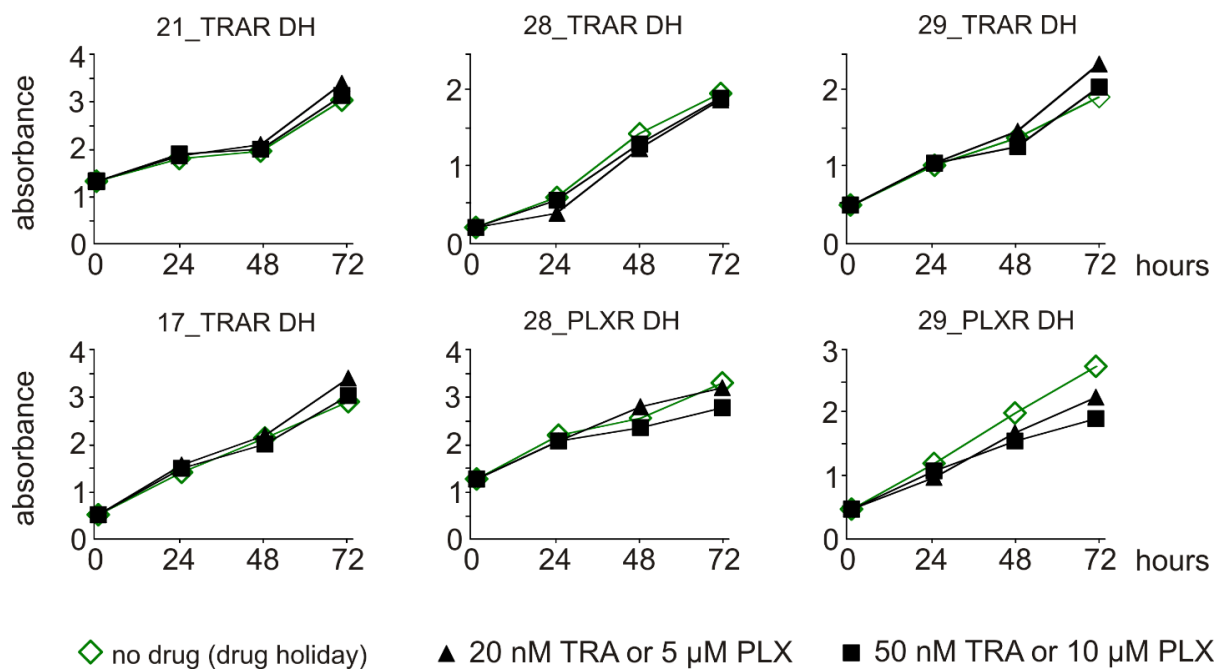

**Supplementary Figure S1.** Changes in the viable cell number over time in cultures of resistant melanoma cells on drug holiday for 10 days and the same cells re-exposed to drugs at two different concentrations. Viable cell number was assessed using acid phosphatase activity assay. Data represent the average values from a typical experiment.

**Supplementary Table S1.** Sequences of primers used in quantitative Real-Time PCR experiments.

| <b>Gene</b>   | <b>Sequence</b>                                                                   |
|---------------|-----------------------------------------------------------------------------------|
| <i>DCT</i>    | <b>forward:</b> CTCAGACCAACTTGGCTACAGC<br><b>reverse:</b> CAACCAAAGCCACCAGTGTCC   |
| <i>MITF-M</i> | <b>forward:</b> GCTGGAAATGCTAGAATA<br><b>reverse:</b> TTCCAGGCTGATGATGTC          |
| <i>MLANA</i>  | <b>forward:</b> GGACAGCAAAGTGTCTCTTCAAG<br><b>reverse:</b> TCAGGTGTCTCGCTGGCTCTTA |
| <i>PMEL</i>   | <b>forward:</b> CTGCCTCAATGTGTCTCTGGCT<br><b>reverse:</b> CAAGGACCACAGCCATCAACAC  |
| <i>RPS17</i>  | <b>forward:</b> AATCTCCTGATCCAAGGCTG<br><b>reverse:</b> CAAGATAGCAGGTTATGTCACG    |
| <i>TYR</i>    | <b>forward:</b> CTGGAAGGATTTGCTAGTCCAC<br><b>reverse:</b> CCTGTACCTGGGACATTGTTT   |
| <i>TYRP1</i>  | <b>forward:</b> GAAAAGAGCCACTTTGTCAGGG<br><b>reverse:</b> CCATCTGGTCCCAGTATGTCT   |

**Supplementary Table S2.** Mutation status of genes encoding proteins involved in regulation of MITF. Only non-synonymous mutations and indels are included. Mutations are marked as homozygous (+/+) or heterozygous (+/-). Prediction of functional effects of amino acid substitution were assessed by using Polyphen-2 software. Polyphen-2 predictions were classified based on the Polyphen-2 scores as benign (scores 0.000-0.449), possibly damaging (scores 0.450-0.959) and probably damaging (scores 0.960-1.000). Names of proteins are given in the brackets if they differ from gene names.

| DMBC                             | 11                                                       | 12                                                       | 21                                                                                             | 28                                                                                             | 29                                                                                             | 33                                                       | 17                                                                                |
|----------------------------------|----------------------------------------------------------|----------------------------------------------------------|------------------------------------------------------------------------------------------------|------------------------------------------------------------------------------------------------|------------------------------------------------------------------------------------------------|----------------------------------------------------------|-----------------------------------------------------------------------------------|
| <i>ATF2</i> <sup>1</sup>         |                                                          |                                                          |                                                                                                |                                                                                                |                                                                                                |                                                          |                                                                                   |
| <i>BRAF</i> <sup>2</sup>         | V600E +/+<br>probably damaging<br>0.971                  | V600E +/+<br>probably damaging<br>0.971                  | V600E +/-<br>probably damaging<br>0.971                                                        | V600E +/-<br>probably damaging<br>0.971                                                        | V600E +/-<br>probably damaging<br>0.971                                                        | V600E +/-<br>probably damaging<br>0.971                  |                                                                                   |
| <i>CDK7</i> <sup>3</sup>         |                                                          |                                                          |                                                                                                |                                                                                                |                                                                                                |                                                          |                                                                                   |
| <i>CDKN1A</i> (p21) <sup>4</sup> |                                                          |                                                          |                                                                                                |                                                                                                |                                                                                                |                                                          |                                                                                   |
| <i>CREB1</i> <sup>5</sup>        |                                                          |                                                          |                                                                                                |                                                                                                |                                                                                                |                                                          |                                                                                   |
| <i>CTNNB1</i> <sup>6</sup>       |                                                          |                                                          |                                                                                                |                                                                                                |                                                                                                |                                                          |                                                                                   |
| <i>DECI</i> <sup>7</sup>         | A60V +/+<br>probably damaging<br>0.999                   | A60V +/+<br>probably damaging<br>0.999                   | A60V +/-<br>probably damaging<br>0.999                                                         | A60V +/-<br>probably damaging<br>0.999                                                         | A60V +/-<br>probably damaging<br>0.999                                                         | A60V +/+<br>probably damaging<br>0.999                   | A60V +/-<br>probably damaging<br>0.999                                            |
| <i>DKKI</i> <sup>8</sup>         |                                                          |                                                          |                                                                                                |                                                                                                |                                                                                                |                                                          |                                                                                   |
| <i>EPAS1</i> (HIF2) <sup>7</sup> |                                                          |                                                          |                                                                                                |                                                                                                |                                                                                                |                                                          |                                                                                   |
| <i>ETV1</i> <sup>9</sup>         | S100G +/-<br>benign 0.000                                | S100G +/-<br>benign 0.000                                | S100G +/-<br>benign 0.000                                                                      | S100G +/-<br>benign 0.000                                                                      | S100G +/-<br>benign 0.000                                                                      |                                                          | S100G +/-<br>benign 0.000                                                         |
| <i>FOXQ1</i> <sup>10</sup>       |                                                          |                                                          | A47P +/-<br>possibly damaging<br>0.890<br>T60P +/+<br>benign 0.000<br>Q61P +/+<br>benign 0.000 | A47P +/-<br>possibly damaging<br>0.890<br>T60P +/+<br>benign 0.000<br>Q61P +/+<br>benign 0.000 | A47P +/-<br>possibly damaging<br>0.890<br>T60P +/+<br>benign 0.000<br>Q61P +/+<br>benign 0.000 |                                                          | T60P +/+<br>benign 0.000<br>Q61P +/+<br>benign 0.000<br>E338G +/+<br>benign 0.000 |
| <i>GLI2</i> <sup>11</sup>        | A1156S +/+<br>benign 0.156<br>D1306N +/+<br>benign 0.000 | A1156S +/+<br>benign 0.156<br>D1306N +/+<br>benign 0.000 | A1156S +/-<br>benign 0.156<br>D1306N +/-<br>benign 0.000                                       | A1156S +/-<br>benign 0.156<br>D1306N +/-<br>benign 0.000                                       | A1156S +/-<br>benign 0.156<br>D1306N +/-<br>benign 0.000                                       | A1156S +/+<br>benign 0.156<br>D1306N +/+<br>benign 0.000 | A1156S +/+<br>benign 0.156<br>D1306N +/+<br>benign 0.000                          |
| <i>HIF1A</i> <sup>7</sup>        |                                                          |                                                          |                                                                                                |                                                                                                |                                                                                                |                                                          |                                                                                   |

|                                  |                                         |                                                                                    |                                         |                                         |                                                                                                                                                                                                                     |                                                                                    |                                         |
|----------------------------------|-----------------------------------------|------------------------------------------------------------------------------------|-----------------------------------------|-----------------------------------------|---------------------------------------------------------------------------------------------------------------------------------------------------------------------------------------------------------------------|------------------------------------------------------------------------------------|-----------------------------------------|
| <i>HOXA1</i> <sup>12</sup>       | R73H +/+<br>benign 0.000                | R73H +/+<br>benign 0.000                                                           | R73H +/-<br>benign 0.000                | R73H +/-<br>benign 0.000                | R73H +/-<br>benign 0.000<br>H67P +/-<br>benign 0.000                                                                                                                                                                | R73H +/-<br>benign 0.000                                                           | R73H +/+<br>benign 0.000                |
| <i>IFNG</i> <sup>13</sup>        |                                         |                                                                                    |                                         |                                         |                                                                                                                                                                                                                     |                                                                                    |                                         |
| <i>IL1A</i> <sup>14</sup>        |                                         |                                                                                    | A114S +/-<br>probably damaging<br>0.982 | A114S +/-<br>probably damaging<br>0.982 | A114S +/-<br>probably damaging<br>0.982                                                                                                                                                                             | A114S +/-<br>probably damaging<br>0.982                                            |                                         |
| <i>IL1B</i> <sup>14</sup>        |                                         | Y206N +/-<br>probably damaging<br>0.999<br>P203H +/-<br>probably damaging<br>1.000 | Y206N +/-<br>probably damaging<br>0.999 |                                         | Y206N +/-<br>probably damaging<br>0.999<br>P203H +/-<br>probably damaging<br>1.000<br>M211I +/-<br>probably damaging<br>1.000<br>K209N +/-<br>possibly damaging<br>0.454<br>K208N +/-<br>probably damaging<br>0.999 | P203H +/-<br>probably damaging<br>1.000                                            | Y206N +/-<br>probably damaging<br>0.999 |
| <i>IL1R1</i> <sup>14</sup>       |                                         |                                                                                    |                                         |                                         | K209N +/-<br>possibly damaging<br>0.454<br>P203H +/-<br>probably damaging<br>1.000                                                                                                                                  |                                                                                    |                                         |
| <i>IL1R2</i> <sup>14</sup>       |                                         |                                                                                    |                                         |                                         |                                                                                                                                                                                                                     |                                                                                    |                                         |
| <i>KIT</i> <sup>5</sup>          |                                         |                                                                                    |                                         |                                         |                                                                                                                                                                                                                     |                                                                                    |                                         |
| <i>LEF1</i> <sup>15</sup>        |                                         |                                                                                    |                                         |                                         |                                                                                                                                                                                                                     |                                                                                    |                                         |
| <i>MAPK14</i> (p38) <sup>5</sup> |                                         |                                                                                    |                                         |                                         |                                                                                                                                                                                                                     |                                                                                    |                                         |
| <i>MC1R</i> <sup>16</sup>        | R151C +/-<br>probably damaging<br>1.000 | R151C +/-<br>probably damaging<br>1.000                                            |                                         |                                         |                                                                                                                                                                                                                     | R151C +/-<br>probably damaging<br>1.000<br>I155T +/-<br>probably damaging<br>0.986 |                                         |

|                                     |                                                                      |                                                                      |                                                      |                                                      |                                                      |                                                                                  |                                                      |
|-------------------------------------|----------------------------------------------------------------------|----------------------------------------------------------------------|------------------------------------------------------|------------------------------------------------------|------------------------------------------------------|----------------------------------------------------------------------------------|------------------------------------------------------|
|                                     |                                                                      |                                                                      | V60L +/-<br>probably damaging<br>0.988               |                                                      |                                                      |                                                                                  | R163Q +/-<br>benign 0.004                            |
| <i>MITF</i> <sup>15</sup>           |                                                                      |                                                                      |                                                      |                                                      |                                                      |                                                                                  |                                                      |
| <i>MYC</i> <sup>17</sup>            |                                                                      |                                                                      |                                                      |                                                      |                                                      |                                                                                  |                                                      |
| <i>NFKB1</i> (p50) <sup>18</sup>    |                                                                      |                                                                      |                                                      |                                                      |                                                      |                                                                                  |                                                      |
| <i>PAX3</i> <sup>19</sup>           |                                                                      |                                                                      |                                                      |                                                      |                                                      | T315K +/-<br>possibly damaging<br>0.616                                          |                                                      |
| <i>POMC</i> (a-MSH) <sup>16</sup>   |                                                                      |                                                                      |                                                      |                                                      |                                                      |                                                                                  |                                                      |
| <i>POU3F2</i> (BRN2) <sup>19</sup>  |                                                                      |                                                                      |                                                      |                                                      |                                                      |                                                                                  |                                                      |
| <i>RELA</i> (p65) <sup>18</sup>     |                                                                      |                                                                      |                                                      |                                                      |                                                      |                                                                                  |                                                      |
| <i>RPS6KA1</i> (RSK1) <sup>20</sup> | K344T +/-<br>benign 0.088                                            | K344T +/-<br>benign 0.088                                            |                                                      |                                                      |                                                      |                                                                                  |                                                      |
| <i>RPS6KA3</i> (RSK2) <sup>20</sup> |                                                                      |                                                                      |                                                      |                                                      |                                                      | I38S +/-<br>benign 0.000                                                         |                                                      |
| <i>RPS6KA2</i> (RSK3) <sup>20</sup> | T34A +/-<br>benign 0.000<br>E32G +/-<br>benign 0.000                 | T34A +/-<br>benign 0.000<br>E32G +/-<br>benign 0.000                 | T34A +/-<br>benign 0.000<br>E32G +/-<br>benign 0.000 | T34A +/-<br>benign 0.000<br>E32G +/-<br>benign 0.000 | T34A +/-<br>benign 0.000<br>E32G +/-<br>benign 0.000 | T34A +/-<br>benign 0.000<br>E32G +/-<br>benign 0.000<br>I10S +/-<br>benign 0.000 | T34A +/-<br>benign 0.000<br>E32G +/-<br>benign 0.000 |
| <i>SMARCA4</i> (BRG1) <sup>21</sup> |                                                                      |                                                                      |                                                      |                                                      |                                                      |                                                                                  |                                                      |
| <i>SOX2</i> <sup>22</sup>           |                                                                      |                                                                      |                                                      |                                                      |                                                      |                                                                                  |                                                      |
| <i>SOX10</i> <sup>23</sup>          |                                                                      |                                                                      |                                                      |                                                      |                                                      |                                                                                  |                                                      |
| <i>STAT3</i> <sup>24</sup>          |                                                                      |                                                                      |                                                      |                                                      |                                                      |                                                                                  |                                                      |
| <i>TYRO3</i> <sup>25</sup>          | I346N +/-<br>benign 0.408<br>V669L +/-<br>probably damaging<br>1.000 | I346N +/-<br>benign 0.408<br>V669L +/-<br>probably damaging<br>1.000 |                                                      |                                                      |                                                      | I346N +/-<br>benign 0.408<br>V669L +/-<br>probably damaging<br>1.000             | I346N +/-<br>benign 0.408                            |
| <i>USP13</i> <sup>26</sup>          |                                                                      |                                                                      |                                                      |                                                      |                                                      |                                                                                  |                                                      |
| <i>VWA5A</i> (BCSC1) <sup>27</sup>  | S499I +/-<br>benign 0.000<br>R506K +/-<br>benign 0.000               | S499I +/-<br>benign 0.000<br>R506K +/-<br>benign 0.000               |                                                      |                                                      |                                                      |                                                                                  |                                                      |

|                           |  |  |  |  |  |  |                           |
|---------------------------|--|--|--|--|--|--|---------------------------|
| <i>ZEB1</i> <sup>28</sup> |  |  |  |  |  |  |                           |
| <i>ZEB2</i> <sup>28</sup> |  |  |  |  |  |  | P451S +/-<br>benign 0.407 |

## References

1. Shah M, Bhoumik A, Goel V, Dewing A, Breitwieser W, Kluger H, Krajewski S, Krajewska M, Dehart J, Lau E, Kallenberg DM, Jeong H, Eroshkin A, Bennett DC, Chin L, Bosenberg M, Jones N, Ronai ZA. A role for ATF2 in regulating MITF and melanoma development. *PLoS Genet.* 2010;6(12):e1001258.
2. Haq R, Shoag J, Andreu-Perez P, Yokoyama S, Edelman H, Rowe GC, Frederick DT, Hurley AD, Nellore A, Kung AL, Wargo JA, Song JS, Fisher DE, Arany Z, Widlund HR. Oncogenic BRAF regulates oxidative metabolism via PGC1a and MITF. *Cancer Cell.* 2013;23(3):302-315.
3. Eliades P, Abraham BJ, Ji Z, Miller DM, Christensen CL, Kwiatkowski N, Kumar R, Njauw CN, Taylor M, Miao B, Zhang T, Wong KK, Gray NS, Young RA, Tsao H. High MITF expression is associated with super-enhancers and suppressed by CDK7 inhibition in melanoma. *J Invest Dermatol.* 2018;138(7):1582-1590.
4. Sestakova B, Ondrusova L, Vachtenheim J. Cell cycle inhibitor p21/WAF1/CIP1 as a cofactor of MITF expression in melanoma cells. *Pigment Cell Melanoma Res.* 2010;23(2):238–251.
5. Saha B, Singh SK, Sarkar C, Bera R, Ratha J, Tobin DJ, Bhadra R. Activation of the Mitf promoter by lipid-stimulated activation of p38-stress signaling to CREB. *Pigment Cell Res.* 2006;19(6):595–605.
6. Schepsky A, Bruser K, Gunnarsson GJ, Goodall J, Hallsson JH, Goding CR, Steingrimssson E, Hecht A. The microphthalmia-associated transcription factor Mitf interacts with beta-catenin to determine target gene expression. *Mol Cell Biol.* 2006;26(23):8914–8927.
7. Feige E, Yokoyama S, Levy C, Khaled M, Igras V, Lin RJ, Lee S, Widlund HR, Granter SR, Kung AL, Fisher DE. Hypoxia-mediated transcriptional repression of the melanoma-associated oncogene MITF. *Proc Natl Acad Sci USA.* 2011;108(43):E924–E933.
8. Hwang I, Park JH, Park HS, Choi KA, Seol KC, Oh SI, Kang S, Hong S. Neural stem cells inhibit melanin production by activation of Wnt inhibitors. *J Dermatol Sci.* 2013;72(3):274–283.
9. Jane-Valbuena J, Widlund HR, Perner S, Johnson LA, Dibner A, Lin WM, Baker AC, Nazarian RM, Vijayendran KG, Sellers WR, Hahn WC, Duncan LM, Rubin MA, Fisher DE, Garraway LA. An oncogenic role for ETV1 in melanoma. *Cancer Res.* 2010;70(5):2075-2084.

10. Bagati A, Bianchi-Smiraglia A, Moparthy S, Kolesnikova K, Fink EE, Kolesnikova M, Roll MV, Jowdy P, Wolff DW, Polechetti A, Yun DH, Lipchick BC, Paul LM, Wrażeń B, Moparthy K, Mudambi S, Morozevich GE, Georgieva SG, Wang J, Shafirstein G, Liu S, Kandel ES, Berman AE, Box NF, Parach G, Nikiforov MA. FOXQ1 controls the induced differentiation of melanocytic cells. *Cell Death Differ.* 2018;25(6):1040-1049.
11. Pierrat MJ, Marsaud V, Mauviel A, Javelaud D. Expression of microphthalmia-associated transcription factor (MITF), which is critical for melanoma progression, is inhibited by both transcription factor GLI2 and transforming growth factor  $\beta$ . *J Biol Chem.* 2012;287(22):17996–18004.
12. Wardwell-Ozgo J, Dogruluk T, Gifford A, Zhang Y, Heffernan TP, van Doorn R, Creighton CJ, Chin L, Scott KL. HOXA1 drives melanoma tumor growth and metastasis and elicits an invasion gene expression signature that prognosticates clinical outcome. *Oncogene.* 2014;33(8):1017–1026.
13. Son J, Kim M, Jou I, Park KC, Kang HY. IFN- $\gamma$  inhibits basal and  $\alpha$ -MSH-induced melanogenesis. *Pigment Cell Melanoma Res.* 2014;27(2):201–208.
14. Kholmanskikh O, van Baren N, Bresseur F, Ottaviani S, Vanacker J, Arts N, van der Bruggen P, Coulie P, De Plaen E. Interleukins 1 $\alpha$  and 1 $\beta$  secreted by some melanoma cell lines strongly reduce expression of MITF-M and melanocyte differentiation antigens. *Int J Cancer.* 2010;127:1625–1636.
15. Saito H, Yasumoto KI, Takeda K, Takahashi K, Fukuzaki A, Orikasa S, Shibahara S. Melanocyte-specific microphthalmia-associated transcription factor isoform activates its own gene promoter through physical interaction with lymphoid-enhancing factor 1. *J Biol Chem.* 2002;277(32):28787–28794.
16. Bellei B, Pitisci A, Catricala C, Larue L, Picardo M. Wnt/beta-catenin signaling is stimulated by alpha-melanocyte-stimulating hormone in melanoma and melanocyte cells: implication in cell differentiation. *Pigment Cell Melanoma Res.* 2010;24(2):309–325.
17. Pouryazdanparast P, Brenner A, Haghighat Z, Guitart J, Rademaker A, Gerami P. The role of 8q24 copy number gains and C-MYC expression in amelanotic cutaneous melanoma. *Mod Pathol.* 2012;25(9):1221–1226.
18. Konieczkowski DJ, Johannessen CM, Abudayyeh O, Kim JW, Cooper ZA, Piris A, Frederick DT, Barzily-Rokni M, Straussman R, Haq R, Fisher DE, Mesirov JP, Hahn WC, Flaherty KT, Wargo JA, Tamayo P, Garraway LA. A melanoma cell distinction influences sensitivity to MAPK pathway inhibitors. *Cancer Discov.* 2014;4(7):816-827.
19. Eccles MR, He S, Ahn A, Slobbe LJ, Jeffs AR, Yoon HS, Baguley BC. MITF and PAX3 play distinct roles in melanoma cell migration; outline of a “genetic switch” theory involving MITF and PAX3 in proliferative and invasive phenotypes of melanoma. *Front Oncol.* 2013;3:229. Vachtenheim J, Ondrusova L, Borovansky J. SWI/SNF chromatin remodeling complex is critical for the expression of microphthalmia-associated transcription factor in melanoma cells. *Biochem Biophys Res Commun.* 2010;392(3):454–459.

20. Wu M, Hemesath TJ, Takemoto CM, Horstmann WA, Wells AG, Price ER, Fisher DZ, Fisher DE. c-Kit triggers dual phosphorylations, which couple activation and degradation of the essential melanocyte factor Mi. *Genes Dev.* 2000;14(3):301–312.
21. Vachtenheim J, Ondrusova L, Borovansky J. SWI/SNF chromatin remodeling complex is critical for the expression of microphthalmia-associated transcription factor in melanoma cells. *Biochem Biophys Res Commun.* 2010;392(3):454–459.
22. Cimadamore F, Shah M, Amador-Arjona A, Navarro-Peran E, Chen C, Huang CT, Terskikh AV. SOX2 modulates levels of MITF in normal human melanocytes, and melanoma lines in vitro. *Pigment Cell Melanoma Res.* 2012;25(4):533-536.
23. Verastegui C, Bille K, Ortonne JP, Ballotti R. Regulation of the microphthalmia-associated transcription factor by the Waardenburg syndrome type 4 gene, SOX10. *J Biol Chem.* 2000;275(40):30757–30760.
24. Liu F, Cao J, Wu J, Sullivan K, Shen J, Ryu B, Xu Z, Wei W, Cui R. Stat3-targeted therapies overcome the acquired resistance to vemurafenib in melanomas. *J Invest Dermatol.* 2013;133(8):2041–2049.
25. Zhu S, Wurdak H, Wang Y, Galkin A, Tao H, Li J, Lyssiotis CA, Yan F, Tu BP, Miraglia L, Walker J, Sun F, Orth A, Schulz PG, Wu X. A genomic screen identifies TYRO3 as a MITF regulator in melanoma. *Proc Natl Acad Sci USA.* 2009;106(40):17025–17030.
26. Zhao X, Fiske B, Kawakami A, Li J, Fisher DE. Regulation of MITF stability by the USP13 deubiquitinase. *Nat Commun.* 2011;2:414.
27. Anghel SI, Correa-Rochal R, Budinska E, Boligan KF, Abraham S, Colombetti S, Fontao L, Mariotti A, Rimoldi D, Ghanem GE, Fisher DE, Levy F, Delorenzi M, Piguat V. Breast cancer suppressor candidate-1 (BCSC-1) is a melanoma tumor suppressor that down regulates MITF. *Pigment Cell Melanoma Res.* 2012;25(4):482–487.
28. Denecker G, Vandamme N, Akay O, Koludrovic D, Taminau J, Lemeire K, Gheldof A, De Craene B, Van Gele M, Brochez L, Udupi GM, Rafferty M, Balint B, Gallagher WM, Ghanem G, Huylebroeck D, Haigh J, van den Oord J, Larue L, Davidson I, Marine JC, Berx G. Identification of a ZEB2-MITF-ZEB1 transcriptional network that controls melanogenesis and melanoma progression. *Cell Death Differ.* 2014;21(8):1250–1261.



**Supplementary Table S3.** Mutation status of genes involved in melanogenesis and differentiation based on the KEGG PATHWAY database. Only non-synonymous mutations and indels are included. Mutations are marked as homozygous (+/+) or heterozygous (+/-). Prediction of functional effects of amino acid substitution were assessed by using Polyphen-2 software. Polyphen-2 predictions were classified based on the Polyphen-2 scores as benign (scores 0.000-0.449), possibly damaging (scores 0.450-0.959) and probably damaging (scores 0.960-1.000). Names of proteins are given in the brackets if they differ from gene names.

| DMBC:             | 11                                      | 12                                                                               | 21                                      | 28                                      | 29                                      | 33                                      | 17                                      |
|-------------------|-----------------------------------------|----------------------------------------------------------------------------------|-----------------------------------------|-----------------------------------------|-----------------------------------------|-----------------------------------------|-----------------------------------------|
| <i>ADCY1</i>      |                                         |                                                                                  |                                         |                                         |                                         |                                         |                                         |
| <i>ADCY2</i>      | V147L +/-<br>possibly damaging<br>0.598 | V147L +/-<br>possibly damaging<br>0.598<br>R9C +/-<br>possibly damaging<br>0.938 | V147L +/-<br>possibly damaging<br>0.598 | V147L +/-<br>possibly damaging<br>0.598 | V147L +/-<br>possibly damaging<br>0.598 | V147L +/-<br>possibly damaging<br>0.598 | V147L +/-<br>possibly damaging<br>0.598 |
| <i>ADCY3</i>      | S107P +/+<br>benign 0.000               | S107P +/+<br>benign 0.000                                                        |                                         |                                         |                                         | S107P +/-<br>benign 0.000               | S107P +/-<br>benign 0.000               |
| <i>ADCY4</i>      |                                         |                                                                                  |                                         |                                         |                                         |                                         |                                         |
| <i>ADCY5</i>      |                                         |                                                                                  |                                         |                                         |                                         |                                         |                                         |
| <i>ADCY6</i>      |                                         |                                                                                  |                                         |                                         |                                         | R730H +/-<br>benign 0.000               |                                         |
| <i>ADCY7</i>      |                                         |                                                                                  |                                         |                                         |                                         |                                         |                                         |
| <i>AP3B1</i>      | V585E +/+<br>benign 0.000               | V585E +/+<br>benign 0.000                                                        | V585E +/-<br>benign 0.000               | V585E +/-<br>benign 0.000               | V585E +/-<br>benign 0.000               | V585E +/+<br>benign 0.000               | V585E +/+<br>benign 0.000               |
| <i>ARAF</i>       |                                         |                                                                                  |                                         |                                         |                                         |                                         |                                         |
| <i>ASIP (ASP)</i> |                                         |                                                                                  |                                         |                                         |                                         |                                         |                                         |
| <i>BMP4</i>       |                                         |                                                                                  | V152A +/+<br>benign 0.002               | V152A +/+<br>benign 0.002               | V152A +/+<br>benign 0.002               | V152A +/+<br>benign 0.002               | V152A +/+<br>benign 0.002               |
| <i>BMPRI1A</i>    |                                         |                                                                                  |                                         |                                         |                                         | P2T +/-<br>benign 0.000                 | P2T +/-<br>benign 0.000                 |
| <i>BMPRI1B</i>    |                                         |                                                                                  |                                         |                                         |                                         |                                         |                                         |
| <i>BMPRI2</i>     |                                         |                                                                                  |                                         |                                         |                                         |                                         |                                         |
| <i>BRAF</i>       | V600E +/+<br>probably<br>damaging 0.971 | V600E +/+<br>probably<br>damaging 0.971                                          | V600E +/-<br>probably<br>damaging 0.971 | V600E +/-<br>probably<br>damaging 0.971 | V600E +/-<br>probably<br>damaging 0.971 | V600E +/-<br>probably<br>damaging 0.971 |                                         |

|                                     |                                         |                                         |                                                                                                |                                                                                                  |                                                                                                |                           |                                                                                   |
|-------------------------------------|-----------------------------------------|-----------------------------------------|------------------------------------------------------------------------------------------------|--------------------------------------------------------------------------------------------------|------------------------------------------------------------------------------------------------|---------------------------|-----------------------------------------------------------------------------------|
| <i>CAMK1</i>                        |                                         |                                         |                                                                                                |                                                                                                  |                                                                                                |                           |                                                                                   |
| <i>CAMK1G</i>                       |                                         |                                         |                                                                                                |                                                                                                  |                                                                                                | V329I +/-<br>benign 0.001 | V329I +/-<br>benign 0.001                                                         |
| <i>CAMK1D</i>                       |                                         |                                         |                                                                                                |                                                                                                  |                                                                                                |                           |                                                                                   |
| <i>CAMK2A</i>                       |                                         |                                         |                                                                                                |                                                                                                  |                                                                                                |                           |                                                                                   |
| <i>CAMK2B</i>                       |                                         |                                         | D91N +/-<br>probably<br>damaging 0.999                                                         | D91N +/-<br>probably<br>damaging 0.999                                                           | D91N +/-<br>probably<br>damaging 0.999                                                         |                           |                                                                                   |
| <i>CAMK2D</i>                       |                                         |                                         |                                                                                                |                                                                                                  |                                                                                                |                           |                                                                                   |
| <i>CAMK2G</i>                       |                                         |                                         |                                                                                                |                                                                                                  |                                                                                                |                           |                                                                                   |
| <i>CREB</i>                         |                                         |                                         |                                                                                                |                                                                                                  |                                                                                                |                           |                                                                                   |
| <i>CREBBP</i> (CBP)                 | V1650G +/-<br>benign 0.183              |                                         |                                                                                                |                                                                                                  |                                                                                                |                           |                                                                                   |
| <i>CTNNB1</i>                       |                                         |                                         |                                                                                                |                                                                                                  |                                                                                                |                           |                                                                                   |
| <i>DCT</i>                          |                                         |                                         |                                                                                                |                                                                                                  |                                                                                                |                           |                                                                                   |
| <i>DVL1</i>                         |                                         |                                         |                                                                                                |                                                                                                  |                                                                                                |                           |                                                                                   |
| <i>DVL2</i>                         |                                         |                                         |                                                                                                |                                                                                                  |                                                                                                |                           |                                                                                   |
| <i>DVL3</i>                         |                                         |                                         |                                                                                                |                                                                                                  |                                                                                                |                           |                                                                                   |
| <i>EDN1</i> (ET-1,<br>endothelin 1) | K198N +/-<br>possibly damaging<br>0.454 | K198N +/-<br>possibly damaging<br>0.454 |                                                                                                |                                                                                                  |                                                                                                |                           |                                                                                   |
| <i>EDNRA</i> (ETAR)                 | S31N +/-<br>benign 0.024                | S31N +/-<br>benign 0.024                |                                                                                                |                                                                                                  |                                                                                                |                           |                                                                                   |
| <i>EDNRB</i> (ETBR)                 |                                         |                                         |                                                                                                |                                                                                                  |                                                                                                |                           |                                                                                   |
| <i>FOXQ1</i>                        |                                         |                                         | A47P +/-<br>possibly damaging<br>0.890<br>T60P +/-<br>benign 0.000<br>Q61P +/-<br>benign 0.000 | A47P +/-<br>possibly damaging<br>0.890<br>, T60P +/-<br>benign 0.000<br>Q61P +/-<br>benign 0.000 | A47P +/-<br>possibly damaging<br>0.890<br>T60P +/-<br>benign 0.000<br>Q61P +/-<br>benign 0.000 |                           | T60P +/-<br>benign 0.000<br>Q61P +/-<br>benign 0.000<br>E338G +/-<br>benign 0.000 |
| <i>FZD1</i>                         |                                         |                                         | P93PP<br>inframe insertion<br>+/-                                                              | P93PP<br>inframe insertion<br>+/-                                                                | P93PP<br>inframe insertion<br>+/-                                                              |                           |                                                                                   |

|                      |                           |                           | P598S +/-<br>probably<br>damaging 1.000 | P598S +/-<br>probably<br>damaging 1.000 | P598S +/-<br>probably<br>damaging 1.000<br>H593P +/-<br>benign 0.001 |                           |                                         |
|----------------------|---------------------------|---------------------------|-----------------------------------------|-----------------------------------------|----------------------------------------------------------------------|---------------------------|-----------------------------------------|
| <i>FZD2</i>          |                           |                           |                                         |                                         |                                                                      |                           |                                         |
| <i>FZD3</i>          |                           |                           |                                         |                                         |                                                                      |                           |                                         |
| <i>FZD4</i>          |                           |                           |                                         |                                         |                                                                      |                           |                                         |
| <i>FZD5</i>          |                           |                           |                                         |                                         |                                                                      | P216L +/-<br>benign 0.001 | P216L +/-<br>benign 0.001               |
| <i>FZD6</i>          | M345L +/-<br>benign 0.008 | M345L +/-<br>benign 0.008 |                                         |                                         |                                                                      | M345L +/-<br>benign 0.008 |                                         |
| <i>FZD7</i>          |                           |                           |                                         |                                         |                                                                      |                           |                                         |
| <i>FZD8</i>          |                           |                           |                                         |                                         |                                                                      |                           |                                         |
| <i>FZD9</i>          |                           |                           |                                         |                                         |                                                                      |                           |                                         |
| <i>FZD10</i>         |                           |                           |                                         |                                         |                                                                      |                           |                                         |
| <i>GRP143</i> (OA1)  |                           |                           |                                         |                                         |                                                                      |                           |                                         |
| <i>GSK3A</i>         |                           |                           |                                         |                                         |                                                                      |                           |                                         |
| <i>GSK3B</i>         |                           |                           |                                         |                                         |                                                                      |                           |                                         |
| <i>HRAS</i>          |                           |                           |                                         |                                         |                                                                      |                           | Q61R +/-<br>benign 0.008                |
| <i>KITLG</i> (SCF)   |                           |                           |                                         |                                         |                                                                      |                           |                                         |
| <i>KRAS</i>          |                           |                           |                                         |                                         |                                                                      |                           |                                         |
| <i>LEF1</i>          |                           |                           |                                         |                                         |                                                                      |                           |                                         |
| <i>LYST</i>          |                           |                           | R2288Q +/-<br>benign 0.001              | R2288Q +/-<br>benign 0.001              | R2288Q +/-<br>benign 0.001                                           |                           |                                         |
| <i>MAP2K1</i> (MEK1) |                           |                           |                                         |                                         |                                                                      |                           | P124S +/-<br>probably<br>damaging 0.999 |
| <i>MAP2K2</i> (MEK2) |                           |                           |                                         |                                         |                                                                      |                           |                                         |
| <i>MAP2K5</i> (MEK5) |                           |                           |                                         |                                         |                                                                      |                           |                                         |
| <i>MAPK3</i> (ERK1)  |                           |                           |                                         |                                         |                                                                      |                           |                                         |
| <i>MAPK1</i> (ERK2)  |                           |                           |                                         |                                         |                                                                      |                           |                                         |
| <i>MAPK7</i> (ERK5)  |                           |                           |                                         |                                         |                                                                      |                           |                                         |

|                        |                                         |                                         |                                         |                                        |                                        |                                                                                    |                                                                                    |
|------------------------|-----------------------------------------|-----------------------------------------|-----------------------------------------|----------------------------------------|----------------------------------------|------------------------------------------------------------------------------------|------------------------------------------------------------------------------------|
| <i>MC1R</i>            | R151C +/-<br>probably<br>damaging 1.000 | R151C +/-<br>probably<br>damaging 1.000 | V60L +/-<br>probably<br>damaging 0.988  |                                        |                                        | R151C +/-<br>probably<br>damaging 1.000<br>I155T +/-<br>probably<br>damaging 0.986 | R163Q +/-<br>benign 0.004                                                          |
| <i>MGRN1</i>           |                                         |                                         |                                         |                                        |                                        | S504L +/-<br>benign 0.000                                                          |                                                                                    |
| <i>MITF</i>            |                                         |                                         |                                         |                                        |                                        |                                                                                    |                                                                                    |
| <i>MLANA</i> (Melan-A) |                                         |                                         |                                         |                                        |                                        |                                                                                    |                                                                                    |
| <i>NRAS</i>            |                                         |                                         |                                         |                                        |                                        |                                                                                    |                                                                                    |
| <i>OCA2</i>            | R419Q +/-<br>probably<br>damaging 0.994 | R419Q +/-<br>probably<br>damaging 0.994 |                                         |                                        |                                        |                                                                                    |                                                                                    |
| <i>PAH</i>             |                                         |                                         |                                         |                                        |                                        |                                                                                    |                                                                                    |
| <i>PLCB1</i> (PLC)     |                                         |                                         |                                         |                                        |                                        |                                                                                    |                                                                                    |
| <i>PLCB2</i> (PLC)     |                                         |                                         |                                         |                                        |                                        |                                                                                    |                                                                                    |
| <i>PLCB3</i> (PLC)     |                                         |                                         | R483H +/-<br>probably<br>damaging 0.971 |                                        |                                        | S911R +/-<br>benign 0.000                                                          |                                                                                    |
| <i>PLCB4</i> (PLC)     | A21T +/-<br>probably<br>damaging 0.993  | A21T +/-<br>probably<br>damaging 0.993  | A21T +/-<br>probably<br>damaging 0.993  | A21T +/-<br>probably<br>damaging 0.993 | A21T +/-<br>probably<br>damaging 0.993 | A21T +/-<br>probably<br>damaging 0.993                                             | A21T +/-<br>probably<br>damaging 0.993<br>L1125V +/-<br>possibly damaging<br>0.956 |
| <i>PLCD1</i> (PLC)     |                                         |                                         |                                         |                                        |                                        |                                                                                    |                                                                                    |
| <i>PLCD3</i> (PLC)     | P542X<br>frameshift variant<br>+/-      | P542X<br>frameshift variant<br>+/-      |                                         |                                        |                                        |                                                                                    | P542X<br>frameshift variant<br>+/-                                                 |
| <i>PLCD4</i> (PLC)     |                                         |                                         |                                         |                                        |                                        |                                                                                    |                                                                                    |

|                     |                                                                                                     |                                                                        |                                                        |                                                        |                                                        |                                                                                            |                                                                                                                                       |
|---------------------|-----------------------------------------------------------------------------------------------------|------------------------------------------------------------------------|--------------------------------------------------------|--------------------------------------------------------|--------------------------------------------------------|--------------------------------------------------------------------------------------------|---------------------------------------------------------------------------------------------------------------------------------------|
| <i>PLCE1 (PLC)</i>  | A643T +/-<br>benign 0.228<br>R1575P +/-<br>benign 0.000<br>K2110E +/-<br>probably<br>damaging 0.984 | R1575P +/-<br>benign 0.000<br>K2110E +/-<br>probably<br>damaging 0.984 | R548L +/-<br>probably<br>damaging 0.997                | R548L +/-<br>probably<br>damaging 0.997                | R548L +/-<br>probably<br>damaging 0.997                | R1575P +/-<br>benign 0.000<br><br>T1777I +/-<br>benign 0.000<br>H1927R +/-<br>benign 0.000 | R1575P +/-<br>benign 0.000<br><br>R548L +/-<br>probably<br>damaging 0.997<br>T1777I +/-<br>benign 0.000<br>H1927R +/-<br>benign 0.000 |
| <i>PLCG1 (PLC)</i>  | S279G +/-<br>benign 0.000<br>I813T +/-<br>benign 0.000                                              | S279G +/-<br>benign 0.000<br>I813T +/-<br>benign 0.000                 |                                                        |                                                        |                                                        | I813T +/-<br>benign 0.000                                                                  |                                                                                                                                       |
| <i>PLCG2 (PLC)</i>  |                                                                                                     |                                                                        |                                                        |                                                        |                                                        |                                                                                            |                                                                                                                                       |
| <i>PLCH1 (PLC)</i>  | P534L +/-<br>benign 0.001                                                                           | P534L +/-<br>benign 0.001                                              | M1236L +/-<br>benign 0.001                             | M1236L +/-<br>benign 0.001                             | M1236L +/-<br>benign 0.001                             |                                                                                            |                                                                                                                                       |
| <i>PLCH2 (PLC)</i>  | P292L +/-<br>benign 0.005                                                                           | P292L +/-<br>benign 0.005                                              | P292L +/-<br>benign 0.005<br>V560M +/-<br>benign 0.266 | P292L +/-<br>benign 0.005<br>V560M +/-<br>benign 0.266 | P292L +/-<br>benign 0.005<br>V560M +/-<br>benign 0.266 | P292L +/-<br>benign 0.005                                                                  |                                                                                                                                       |
| <i>PLCL1 (PLC)</i>  | V667I +/-<br>probably<br>damaging 1.000<br>Q368R +/-<br>benign 0.001<br>Q270R +/-<br>benign 0.016   | V667I +/-<br>probably<br>damaging 1.000                                | V667I +/-<br>probably<br>damaging 1.000                | V667I +/-<br>probably<br>damaging 1.000                | V667I +/-<br>probably<br>damaging 1.000                | V667I +/-<br>probably<br>damaging 1.000                                                    |                                                                                                                                       |
| <i>PLCL2 (PLC)</i>  |                                                                                                     |                                                                        |                                                        |                                                        |                                                        |                                                                                            |                                                                                                                                       |
| <i>PLCZI (PLC)</i>  |                                                                                                     |                                                                        |                                                        |                                                        |                                                        |                                                                                            |                                                                                                                                       |
| <i>PMEL (gp100)</i> |                                                                                                     |                                                                        |                                                        |                                                        |                                                        |                                                                                            |                                                                                                                                       |
| <i>POMC</i>         |                                                                                                     |                                                                        |                                                        |                                                        |                                                        |                                                                                            |                                                                                                                                       |

|                                    |                                         |                                         |                           |                           |                           |                                         |                                         |
|------------------------------------|-----------------------------------------|-----------------------------------------|---------------------------|---------------------------|---------------------------|-----------------------------------------|-----------------------------------------|
| <i>PRKAA1</i><br>(AMPK $\alpha$ 1) |                                         |                                         |                           |                           |                           |                                         |                                         |
| <i>PRKAA2</i><br>(AMPK $\alpha$ 2) |                                         |                                         |                           |                           |                           |                                         |                                         |
| <i>PRKCA</i> (PKC)                 | V568I +/-<br>benign 0.000               | V568I +/-<br>benign 0.000               | V568I +/-<br>benign 0.000 | V568I +/-<br>benign 0.000 | V568I +/-<br>benign 0.000 | V568I +/-<br>benign 0.000               | V568I +/-<br>benign 0.000               |
| <i>PRKCB</i> (PKC)                 |                                         |                                         |                           |                           |                           |                                         |                                         |
| <i>PRKCZ</i> (PKC)                 |                                         |                                         | S148R +/-<br>benign 0.002 | S148R +/-<br>benign 0.002 | S148R +/-<br>benign 0.002 |                                         |                                         |
| <i>PRKCG</i> (PKC)                 |                                         |                                         |                           |                           |                           |                                         |                                         |
| <i>PRKCE</i> (PKC)                 |                                         |                                         |                           |                           |                           |                                         |                                         |
| <i>PRKCD</i> (PKC)                 |                                         |                                         |                           |                           |                           |                                         |                                         |
| <i>PRKCH</i> (PKC)                 |                                         |                                         |                           |                           |                           |                                         |                                         |
| <i>PTGS2</i> (COX-2)               |                                         |                                         |                           |                           |                           |                                         |                                         |
| <i>RAF1</i> (CRAF)                 |                                         |                                         |                           |                           |                           |                                         |                                         |
| <i>SOX5</i>                        |                                         |                                         |                           |                           |                           |                                         |                                         |
| <i>TCF7L2</i> (TCF4)               |                                         |                                         |                           |                           |                           |                                         |                                         |
| <i>TP53</i> (p53)                  | P72R +/-<br>benign 0.083                |                                         | P72R +/-<br>benign 0.083  | P72R +/-<br>benign 0.083  | P72R +/-<br>benign 0.083  | P72R +/-<br>benign 0.083                | P72R +/-<br>benign 0.083                |
| <i>TYR</i>                         | R402Q +/-<br>probably<br>damaging 0.999 | R402Q +/-<br>probably<br>damaging 0.999 |                           |                           |                           | R402Q +/-<br>probably<br>damaging 0.999 | R402Q +/-<br>probably<br>damaging 0.999 |
| <i>TYRP1</i>                       |                                         |                                         |                           |                           |                           |                                         |                                         |
| <i>USF1</i>                        |                                         |                                         |                           |                           |                           |                                         |                                         |
| <i>WNT1</i>                        |                                         |                                         |                           |                           |                           |                                         |                                         |
| <i>WNT2</i>                        |                                         |                                         |                           |                           |                           |                                         |                                         |
| <i>WNT2B</i>                       |                                         |                                         |                           |                           |                           |                                         |                                         |
| <i>WNT3</i>                        |                                         |                                         |                           |                           |                           |                                         |                                         |
| <i>WNT3A</i>                       |                                         |                                         |                           |                           |                           |                                         |                                         |
| <i>WNT4</i>                        |                                         |                                         |                           |                           |                           |                                         |                                         |
| <i>WNT5A</i>                       |                                         |                                         |                           |                           |                           |                                         |                                         |
| <i>WNT5B</i>                       |                                         |                                         |                           |                           |                           |                                         |                                         |
| <i>WNT6</i>                        | P155R +/-<br>benign 0.026               | P155R +/-<br>benign 0.026               |                           |                           | P155R +/-<br>benign 0.026 |                                         |                                         |
| <i>WNT7A</i>                       |                                         |                                         |                           |                           |                           |                                         |                                         |

|               |                           |                           |                                                       |                                                       |                                                       |                           |                                                       |
|---------------|---------------------------|---------------------------|-------------------------------------------------------|-------------------------------------------------------|-------------------------------------------------------|---------------------------|-------------------------------------------------------|
| <i>WNT7B</i>  |                           |                           |                                                       |                                                       |                                                       |                           |                                                       |
| <i>WNT8A</i>  |                           |                           |                                                       |                                                       |                                                       |                           |                                                       |
| <i>WNT8B</i>  | C11S +/+<br>benign 0.000  | C11S +/+<br>benign 0.000  |                                                       |                                                       |                                                       |                           |                                                       |
| <i>WNT9A</i>  |                           |                           |                                                       |                                                       |                                                       |                           |                                                       |
| <i>WNT9B</i>  | M106T +/-<br>benign 0.000 | M106T +/-<br>benign 0.000 | M106T +/+<br>benign 0.000                             | M106T +/+<br>benign 0.000                             | M106T +/+<br>benign 0.000                             | M106T +/-<br>benign 0.000 | M106T +/+<br>benign 0.000                             |
| <i>WNT10A</i> |                           |                           |                                                       |                                                       |                                                       |                           |                                                       |
| <i>WNT10B</i> |                           |                           |                                                       |                                                       |                                                       |                           |                                                       |
| <i>WNT11</i>  |                           |                           |                                                       |                                                       |                                                       |                           |                                                       |
| <i>WNT16</i>  |                           |                           | G82R +/-<br>benign 0.000<br>T263I +/-<br>benign 0.003 | G82R +/-<br>benign 0.000<br>T263I +/-<br>benign 0.003 | G82R +/-<br>benign 0.000<br>T263I +/-<br>benign 0.003 |                           | G82R +/-<br>benign 0.000<br>T263I +/-<br>benign 0.003 |

**Supplementary Table S4.** Non-synonymous mutations and indels in genes encoding proteins involved in regulation of MITF, which were acquired in trametinib-resistant (TRAR) and vemurafenib-resistant (PLXR) cell lines. Mutations are marked as homozygous (+/+) or heterozygous (+/-). Prediction of functional effects of amino acid substitution were assessed by using Polyphen-2 software. Polyphen-2 predictions were classified based on the Polyphen-2 scores as benign (scores 0.000-0.449), possibly damaging (scores 0.450-0.959) and probably damaging (scores 0.960-1.000). Names of proteins are given in the brackets if they differ from gene names.

|                       | TRAR                      |                           |                           |                                         | PLXR                                    |                                                        |                           | present in drug-naïve cell lines |
|-----------------------|---------------------------|---------------------------|---------------------------|-----------------------------------------|-----------------------------------------|--------------------------------------------------------|---------------------------|----------------------------------|
|                       | 21                        | 28                        | 29                        | 17                                      | 21                                      | 28                                                     | 29                        |                                  |
| <i>BRAF</i>           |                           |                           |                           |                                         | V600E +/+<br>probably damaging<br>0.971 | V600E +/+<br>probably damaging<br>0.971                |                           | DMBC11<br>DMBC12                 |
| <i>FOXQ1</i>          | E338G +/+<br>benign 0.000 | E338G +/+<br>benign 0.000 | E338G +/+<br>benign 0.000 |                                         |                                         |                                                        | E338G +/+<br>benign 0.000 |                                  |
| <i>HOXA1</i>          |                           |                           |                           |                                         | R73H +/+<br>benign 0.000                |                                                        |                           |                                  |
| <i>IFNG</i>           |                           |                           |                           |                                         | Q87H +/-<br>benign 0.144                |                                                        |                           |                                  |
| <i>MC1R</i>           |                           |                           |                           |                                         | R151C +/+<br>probably damaging<br>1.000 | R151C +/+<br>probably damaging<br>1.000                |                           | DMBC11<br>DMBC12                 |
| <i>RPS6KA1</i> (RSK1) |                           |                           |                           |                                         | K344T +/-<br>benign 0.088               | K344T +/-<br>benign 0.088                              |                           |                                  |
| <i>SOX2</i>           |                           |                           |                           | T222I +/-<br>possibly damaging<br>0.804 |                                         |                                                        |                           | none                             |
| <i>TYRO3</i>          |                           |                           |                           |                                         | I346N +/-<br>benign 0.408               | I346N +/-<br>benign 0.408                              |                           |                                  |
| <i>VWA5A</i> (BCSC1)  |                           |                           |                           |                                         | S499I +/-<br>benign 0.000               | S499I +/-<br>benign 0.000<br>R506K +/-<br>benign 0.000 |                           |                                  |



**Supplementary Table S5.** Mutation status of genes involved in melanogenesis and differentiation based on the KEGG PATHWAY database, which were acquired in trametinib-resistant (TRAR) and vemurafenib-resistant (PLXR) cell lines. Mutations are marked as homozygous (++) or heterozygous (+/-). Prediction of functional effects of amino acid substitution were assessed by using Polyphen-2 software. Polyphen-2 predictions were classified based on the Polyphen-2 scores as benign (scores 0.000-0.449), possibly damaging (scores 0.450-0.959) and probably damaging (scores 0.960-1.000). Names of proteins are given in the brackets if they differ from gene names.

|                                     | TRAR                     |                          |                          |                                   | PLXR                                    |                                         |                                                               | present in drug-naïve cell lines: |
|-------------------------------------|--------------------------|--------------------------|--------------------------|-----------------------------------|-----------------------------------------|-----------------------------------------|---------------------------------------------------------------|-----------------------------------|
|                                     | 21                       | 28                       | 29                       | 17                                | 21                                      | 28                                      | 29                                                            |                                   |
| <i>ADCY2</i>                        |                          |                          |                          |                                   | R9C +/-<br>possibly damaging<br>0.938   | R9C +/-<br>possibly damaging<br>0.938   |                                                               | DMBC12                            |
| <i>ADCY3</i>                        |                          |                          |                          |                                   | S107P ++<br>benign 0.000                | S107P ++<br>benign 0.000                |                                                               |                                   |
| <i>AP3B1</i>                        |                          |                          |                          |                                   | V585E ++<br>benign 0.000                | V585E ++<br>benign 0.000                |                                                               |                                   |
| <i>BRAF</i>                         |                          |                          |                          |                                   | V600E ++<br>probably damaging<br>0.971  | V600E ++<br>probably damaging<br>0.971  |                                                               | DMBC11<br>DMBC12                  |
| <i>DCT</i>                          |                          |                          |                          |                                   |                                         |                                         | P456-F478<br>dup<br>disruptive<br>inframe<br>insertion<br>+/- | none                              |
| <i>EDN1</i> (ET-1,<br>endothelin 1) |                          |                          |                          |                                   | K198N +/-<br>possibly damaging<br>0.454 | K198N +/-<br>possibly damaging<br>0.454 |                                                               | DMBC11<br>DMBC12                  |
| <i>EDNRA</i> (ETAR)                 |                          |                          |                          |                                   | S31N ++<br>benign 0.024                 | S31N ++<br>benign 0.024                 |                                                               |                                   |
| <i>FOXQ1</i>                        | E338G ++<br>benign 0.000 | E338G ++<br>benign 0.000 | E338G ++<br>benign 0.000 |                                   |                                         |                                         | E338G ++<br>benign 0.000                                      |                                   |
| <i>FZD1</i>                         |                          |                          |                          | P93PP<br>inframe insertion<br>+/- |                                         |                                         |                                                               | DMBC21<br>DMBC28<br>DMBC29        |
| <i>FZD6</i>                         |                          |                          |                          |                                   | M345L ++<br>benign 0.008                | M345L ++<br>benign 0.008                |                                                               |                                   |

|               |                                    |                                    |                                                                                   |                                         |                                                                                                     |                                                                                                     |                                         |                                     |
|---------------|------------------------------------|------------------------------------|-----------------------------------------------------------------------------------|-----------------------------------------|-----------------------------------------------------------------------------------------------------|-----------------------------------------------------------------------------------------------------|-----------------------------------------|-------------------------------------|
| MAP2K2 (MEK2) |                                    |                                    | F57V +/-<br>probably damaging<br>0.999<br>L201V +/-<br>probably damaging<br>1.000 |                                         |                                                                                                     |                                                                                                     |                                         | none                                |
| MC1R          |                                    |                                    |                                                                                   |                                         | R151C +/-<br>probably damaging<br>1.000                                                             | R151C +/-<br>probably damaging<br>1.000                                                             |                                         | DMBC11<br>DMBC12                    |
| OCA2          |                                    |                                    |                                                                                   |                                         | R419Q +/-<br>probably damaging<br>0.994                                                             | R419Q +/-<br>probably damaging<br>0.994                                                             |                                         | DMBC11<br>DMBC12                    |
| PLCB3 (PLC)   |                                    |                                    | R483H +/-<br>probably damaging<br>0.971                                           |                                         |                                                                                                     |                                                                                                     | R483H +/-<br>probably damaging<br>0.971 | DMBC21                              |
| PLCB4 (PLC)   |                                    |                                    |                                                                                   |                                         | A21T +/-<br>probably damaging<br>0.993                                                              | A21T +/-<br>probably damaging<br>0.993                                                              |                                         | DMBC11<br>DMBC12                    |
| PLCD1 (PLC)   |                                    |                                    |                                                                                   |                                         |                                                                                                     | R9Q +/-<br>benign 0.015                                                                             |                                         |                                     |
| PLCD3 (PLC)   | P542X<br>frameshift<br>variant +/+ | P542X<br>frameshift<br>variant +/+ | P542X<br>frameshift<br>variant +/+                                                |                                         | P542X<br>frameshift<br>variant +/+                                                                  | P542X<br>frameshift<br>variant +/+                                                                  | P542X<br>frameshift<br>variant +/+      | DMBC11<br>DMBC12<br>DMBC17          |
| PLCE1 (PLC)   |                                    |                                    |                                                                                   | R548L +/-<br>probably damaging<br>0.997 | A643T +/-<br>benign 0.228<br>R1575P +/-<br>benign 0.000<br>K2110E +/-<br>probably damaging<br>0.984 | A643T +/-<br>benign 0.228<br>R1575P +/-<br>benign 0.000<br>K2110E +/-<br>probably damaging<br>0.984 |                                         | none as +/-<br><br>DMBC11<br>DMBC12 |
| PLCG1 (PLC)   |                                    |                                    |                                                                                   |                                         | S279G +/-<br>benign 0.000<br>I813T +/-<br>benign 0.000                                              | S279G +/-<br>benign 0.000<br>I813T +/-<br>benign 0.000                                              |                                         |                                     |
| PLCH1 (PLC)   |                                    |                                    | M1236L +/-<br>benign 0.001                                                        |                                         | P534L +/-<br>benign 0.001                                                                           | P534L +/-<br>benign 0.001                                                                           |                                         |                                     |

|                    |                                     |                                     |                                     |                                     |                                                                                    |                                         |                                     |                            |
|--------------------|-------------------------------------|-------------------------------------|-------------------------------------|-------------------------------------|------------------------------------------------------------------------------------|-----------------------------------------|-------------------------------------|----------------------------|
| <i>PLCL1 (PLC)</i> |                                     |                                     |                                     |                                     | Q368R +/-<br>benign 0.001                                                          | Q368R +/-<br>benign 0.001               |                                     |                            |
| <i>TP53 (p53)</i>  | P72R +/-<br>benign 0.083            |                                     |                                     | R156H +/-<br>benign 0.000           |                                                                                    |                                         |                                     |                            |
| <i>TYR</i>         |                                     |                                     |                                     |                                     | R402Q +/-<br>probably damaging<br>0.999<br>F429L +/-<br>probably damaging<br>0.982 | R402Q +/-<br>probably damaging<br>0.999 |                                     | DMBC11<br>DMBC12<br>DMBC17 |
| <i>WNT6</i>        | P155R +/-<br>benign 0.026           | P155R +/-<br>benign 0.026           |                                     |                                     | P155R +/-<br>benign 0.026                                                          | P155R +/-<br>benign 0.026               |                                     |                            |
| <i>WNT8B</i>       |                                     |                                     |                                     |                                     | C11S +/-<br>benign 0.000                                                           | C11S +/-<br>benign 0.000                |                                     |                            |
| <i>WNT16</i>       | M1X<br>frameshift<br>variant<br>+/- | M1X<br>frameshift<br>variant<br>+/- | M1X<br>frameshift<br>variant<br>+/- | M1X<br>frameshift<br>variant<br>+/- |                                                                                    |                                         | M1X<br>frameshift<br>variant<br>+/- | none                       |

**Supplementary Table S6.** Amino acid substitutions in MC1R found in patient-derived melanoma cell

| <b>MC1R variant</b> | <b>patient-derived cell lines used in this study</b>                           | <b>activity (vs. MC1R<sup>wt</sup>)</b> | <b>cell surface level (vs. MC1R<sup>wt</sup>)<sup>4</sup></b> | <b>average increased risk of cutaneous melanoma (n-fold vs. MC1R<sup>wt</sup>)<sup>5</sup></b> |
|---------------------|--------------------------------------------------------------------------------|-----------------------------------------|---------------------------------------------------------------|------------------------------------------------------------------------------------------------|
| <b>R151C</b>        | DMBC11 (+/+)<br>DMBC12 (+/+)<br>DMBC33 (+/-)<br>21_PLXR (+/+)<br>28_PLXR (+/+) | reduced <sup>1</sup>                    | reduced                                                       | 8.9                                                                                            |
| <b>V60L</b>         | DMBC21 (+/-)                                                                   | reduced <sup>1,2,3</sup>                | normal/intermediate                                           | 8.2                                                                                            |
| <b>R163Q</b>        | DMBC17 (+/-)                                                                   | reduced <sup>3</sup>                    | normal/intermediate                                           | 2.7                                                                                            |
| <b>I155T</b>        | DMBC33 (+/-)                                                                   | reduced <sup>2</sup>                    | reduced                                                       | 1.2                                                                                            |

lines (this study) and their functional consequences (literature search).

## References

1. Schiöth HB, Phillips SR, Rudzish R, Birch-Machin MA, Wikberg JE, Rees JL. Loss of function mutations of the human melanocortin 1 receptor are common and are associated with red hair. *Biochem Biophys Res Commun.* 1999 260(2):488-91.
2. Herraiz C, Journé F, Ghanem G, Jiménez-Cervantes C, García-Borrón JC. Functional status and relationships of melanocortin 1 receptor signaling to the cAMP and extracellular signal-regulated protein kinases 1 and 2 pathways in human melanoma cells. *Int J Biochem Cell Biol.* 2012 44(12):2244-52.
3. Doyle JR, Fortin JP, Beinborn M, Kopin S. Selected melanocortin 1 receptor single-nucleotide polymorphisms differentially alter multiple signaling pathways. *J Pharmacol Exp Ther* 2012 342(2):318-26.
4. Beaumont KA, Newton RA, Smit DJ, Leonard JH, Stow JL, Sturm RA. Altered cell surface expression of human MC1R variant receptor alleles associated with red hair and skin cancer risk. *Hum Mol Genet.* 2005 14(15):2145-54.
5. Pasquali E, García-Borrón JC, Fagnoli MC, Gandini S, Maisonneuve P, Bagnardi V, Specchia C, Liu F, Kayser M, Nijsten T, Nagore E, Kumar R, Hansson J, Kanetsky PA, Ghiorzo P, Debniak T, Branicki W, Gruis NA, Han J, Dwyer T, Blizzard L, Landi MT, Palmieri G, Ribas G, Stratigos A, Council ML, Autier P, Little J, Newton-Bishop J, Sera F, Raimondi S; M-SKIP Study Group. MC1R variants increased the risk of sporadic cutaneous melanoma in darker-pigmented Caucasians: a pooled-analysis from the M-SKIP project. *Int J Cancer.* 2015 136(3):618-31.
